# Supplementary material for: Pressure tuned photoluminescence and band gap in two-dimensional layered g-C3N4: the effect of interlayer interactions
Source: Royal Society of Chemistry journal article supplement (doi:10.1039/d0nr01542c), 2020-01-01
Supplement: d0nr01542c1.pdf [file d0nr01542c1.pdf]

## Supplemental Materials

### For

#### Pressure tuned photoluminescence and band gap in two-dimensional layered g-C<sub>3</sub>N<sub>4</sub>: the effect of interlayer interactions

Kuo Hu, Mingguang Yao<sup>a)</sup>, Zhenxing Yang, Guanjun Xiao, Luyao Zhu, Hua Zhang, Ran Liu, Bo Zou, Bingbing Liu<sup>b)</sup>

1

2

3

4

5

6

7

8

9

10

11

12

13

14

15

16

17

18

19

20

21

22

23

24

25

26

27 Address corresponding to <sup>a)</sup> Mingguang Yao, [yaomg@jlu.edu.cn](mailto:yaomg@jlu.edu.cn); <sup>b)</sup> Bingbing Liu,

28 [liubb@jlu.edu.cn](mailto:liubb@jlu.edu.cn).

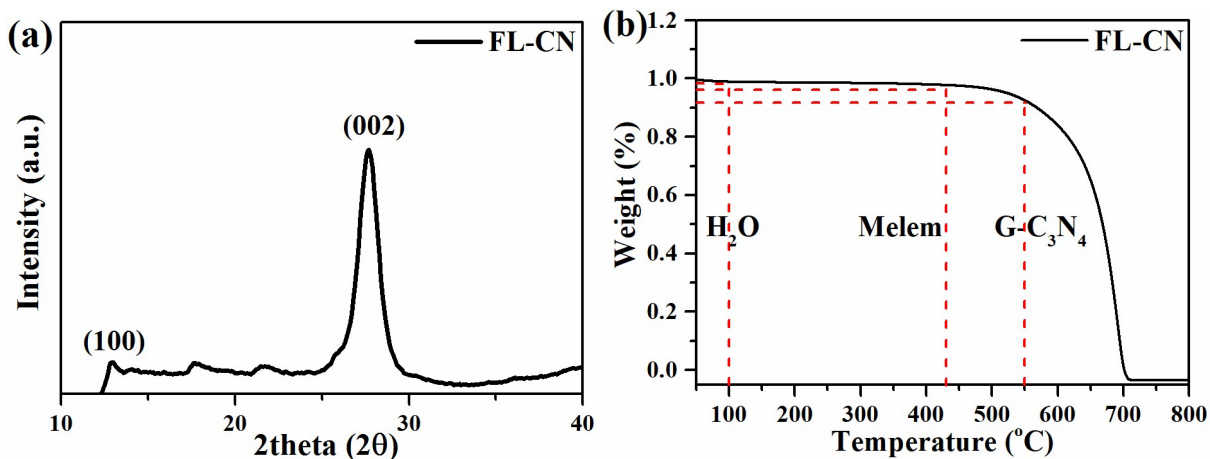

35

36 **Fig. S1** (a) Typical XRD pattern of FL-CN; (b) TGA curve of FL-CN measured under N<sub>2</sub>  
 37 atmosphere.

38 The (100) diffraction peak in the Fig. S1a corresponds to the periodic packing of heptazines  
 39 in the conjugated planes, while the (200) peak corresponds to the interlayer stacking of  
 40 aromatic CN units.<sup>1,2</sup> The TGA curve (Fig. S1b) suggests a high purity of the g-C<sub>3</sub>N<sub>4</sub>.<sup>3</sup>

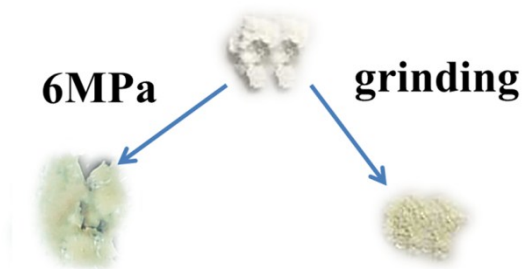

41

42 **Fig. S2** The optical images of the recovered sample after compression and grinding.

|         | The peak position (nm) |     |     | The peak intensity |       |      |
|---------|------------------------|-----|-----|--------------------|-------|------|
|         | P1                     | P2  | P3  | P1                 | P2    | P3   |
| FL-CN   | 432                    | 452 | 491 | 6313               | 8472  | 4066 |
| 6MPa-CN | 434                    | 454 | 491 | 10969              | 16224 | 8941 |

43

44 **Table S1.** The peak position and intensity of FL-CN and 6MPa-CN.

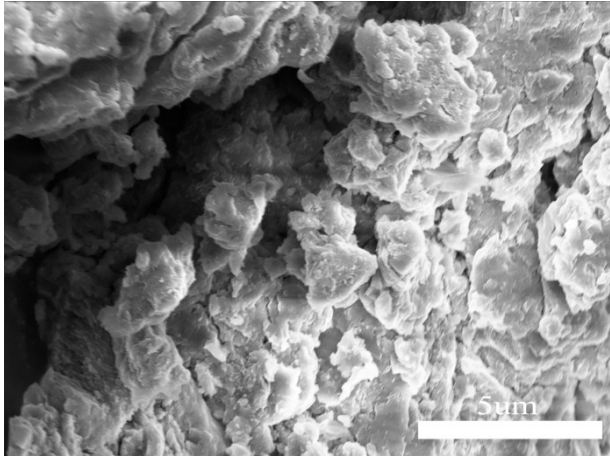

45

46 **Fig. S3** SEM image of the ground sample.

47 Our SEM observation on the released sample after uniaxial compression suggests a  
 48 planarization of  $g\text{-C}_3\text{N}_4$  layers, from which we can see that no obvious wavy layers but  
 49 instead flatten layered structures can be observed in some areas after compression. For  
 50 comparison, the sample after grinding shows that  $\text{C}_3\text{N}_4$  mainly forms particle-like aggregation  
 51 which is similar to the bulk  $g\text{-C}_3\text{N}_4$ , but with decreased size. From the recorded XRD patterns  
 52 in Fig. 3e (main text), we can see that the intensity of the (002) diffraction peak from  
 53 intralayer of  $g\text{-C}_3\text{N}_4$  increases obviously both after uniaxial compression and grinding,  
 54 compared with the pristine sample, suggesting that the periodic arrangement of  $g\text{-C}_3\text{N}_4$  layers  
 55 may become better.

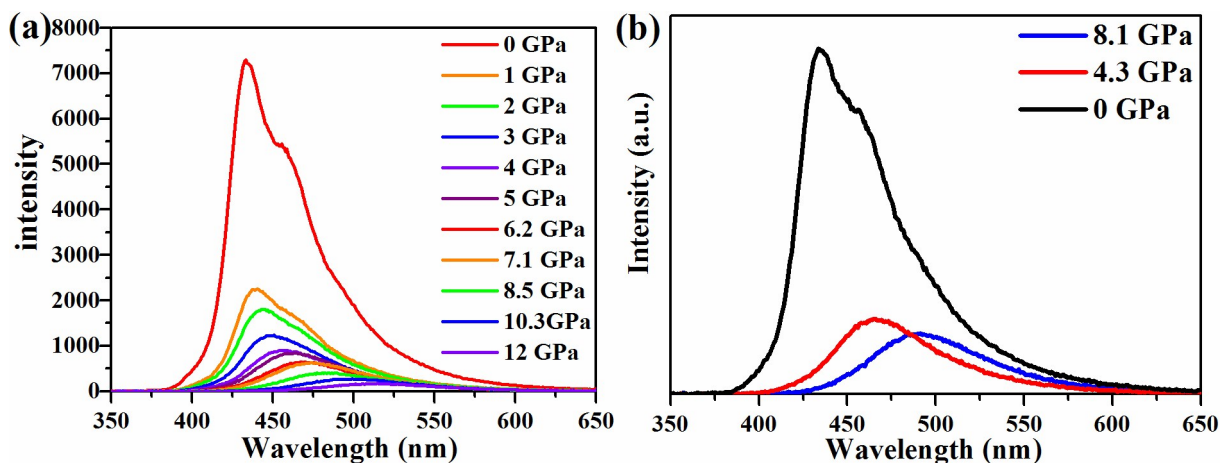

56

57 **Fig. S4** PL spectra of the sample (a) at selected pressures upon compression and (b) upon  
 58 decompression to ambient pressure.

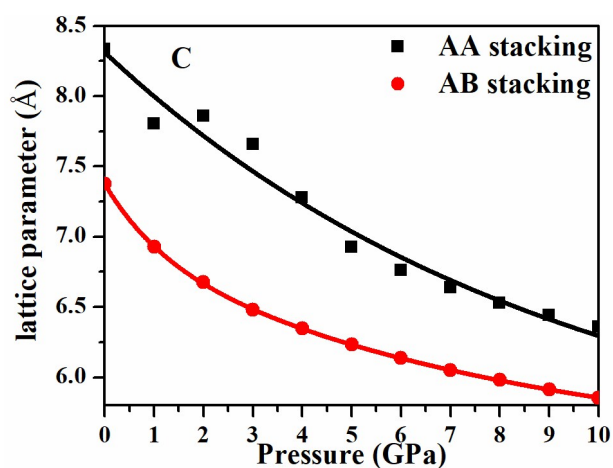

59

60 **Fig. S5** Theoretically calculated pressure dependences of the (002) reflection of g-C<sub>3</sub>N<sub>4</sub> with  
 61 AA-and AB stackings, respectively.

62

### 63 References

- 64 1 D. Feng, Y. Cheng, J. He, L. Zheng, D. Shao, W. Wang, W. Wang, F. Lu, H. Dong, H.  
 65 Liu, R. Zheng and H. Liu, *Carbon N. Y.*, 2017, **125**, 454–463.  
 66 2 P. Niu, L. Zhang, G. Liu and H. M. Cheng, *Adv. Funct. Mater.*, 2012, **22**, 4763–4770.  
 67 3 Y. Yuan, L. Zhang, J. Xing, M. I. B. Utama, X. Lu, K. Du, Y. Li, X. Hu, S. Wang, A.  
 68 Genç, R. Dunin-Borkowski, J. Arbiol and Q. Xiong, *Nanoscale*, 2015, **7**, 12343–12350.  
 69
